# Supplementary material for: Serine protease dynamics revealed by NMR analysis of the thrombin-thrombomodulin complex
Source: PubMed Central journal article supplement (PMC8087772; doi:10.1038/s41598-021-88432-z), 2021-04-30
Supplement: 41598_2021_88432_MOESM1_ESM.pdf [file 41598_2021_88432_MOESM1_ESM.pdf]

## **Supplementary Information for**

### **Serine protease dynamics revealed by NMR analysis of the thrombin-thrombomodulin complex**

Riley B. Peacock<sup>1</sup>, Taylor McGrann<sup>1</sup> Marco Tonelli<sup>2</sup>, and Elizabeth A. Komives<sup>1\*</sup>

<sup>1</sup>Department of Chemistry and Biochemistry, University of California, San Diego, 9500 Gilman Drive, La Jolla, CA 92093-0378.

<sup>2</sup> NMRFAM University of Wisconsin, 433 Babcock Drive, Madison, WI 53706.

\*Corresponding author: Elizabeth A. Komives

Department of Chemistry and Biochemistry, University of California, San Diego, 9500 Gilman Drive, La Jolla, CA 92092-0378\*Paste corresponding author name(s) here.

**Email:** [ekomives@ucsd.edu](mailto:ekomives@ucsd.edu)

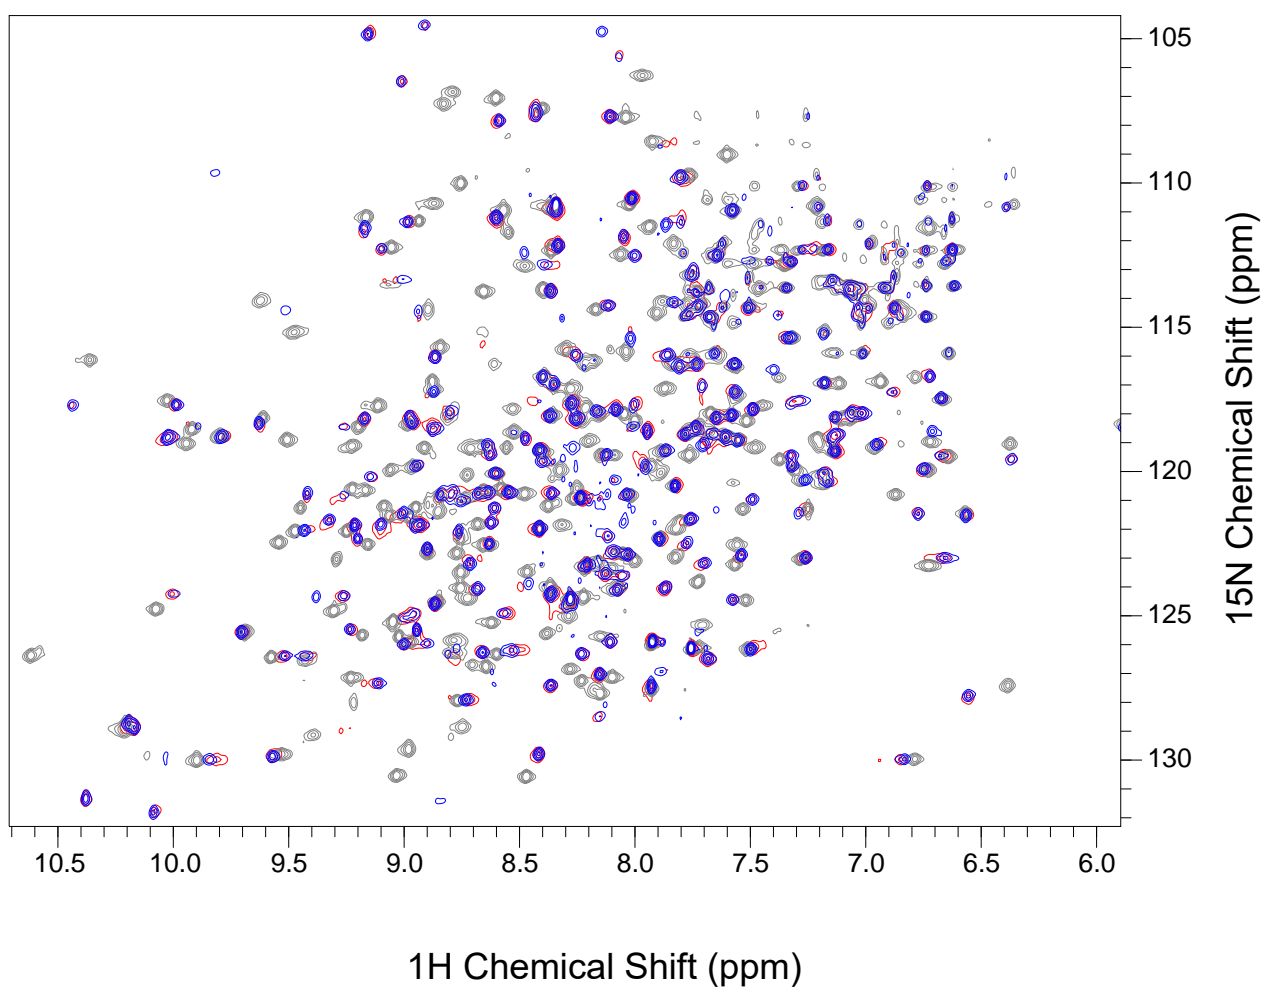

Fig. S1. TROSY HSQC Spectra of apo thrombin (blue), thrombin inhibited with D-Phe-Pro-Arg chloromethylketone (PPACK) (grey) and the thrombin-TM456 complex (red). All spectra were acquired at 800 MHz, room temperature, and a concentration of 0.12 mM.

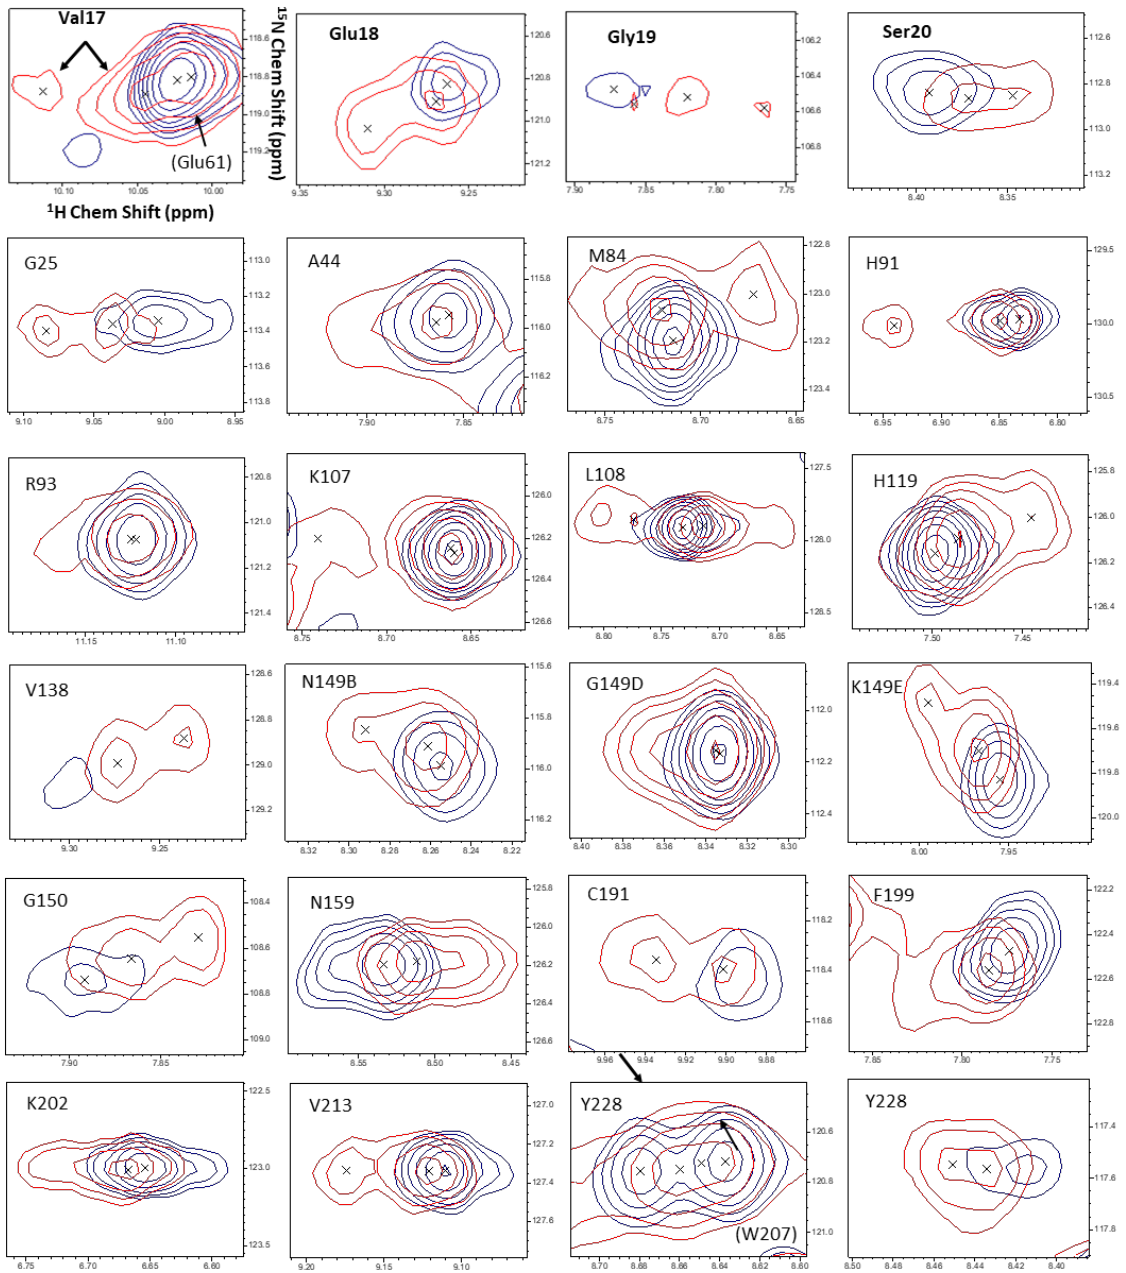

**Fig. S2.** All thrombin resonances that appeared as doublets or multiplets in the thrombin-TM456 HSQC spectrum. Residues are numbered according to the CT numbering scheme. The red traces correspond to the thrombin-TM456 HSQC spectrum taken at 800 MHz, while the blue traces correspond to the apo-thrombin spectrum taken at 800 MHz.

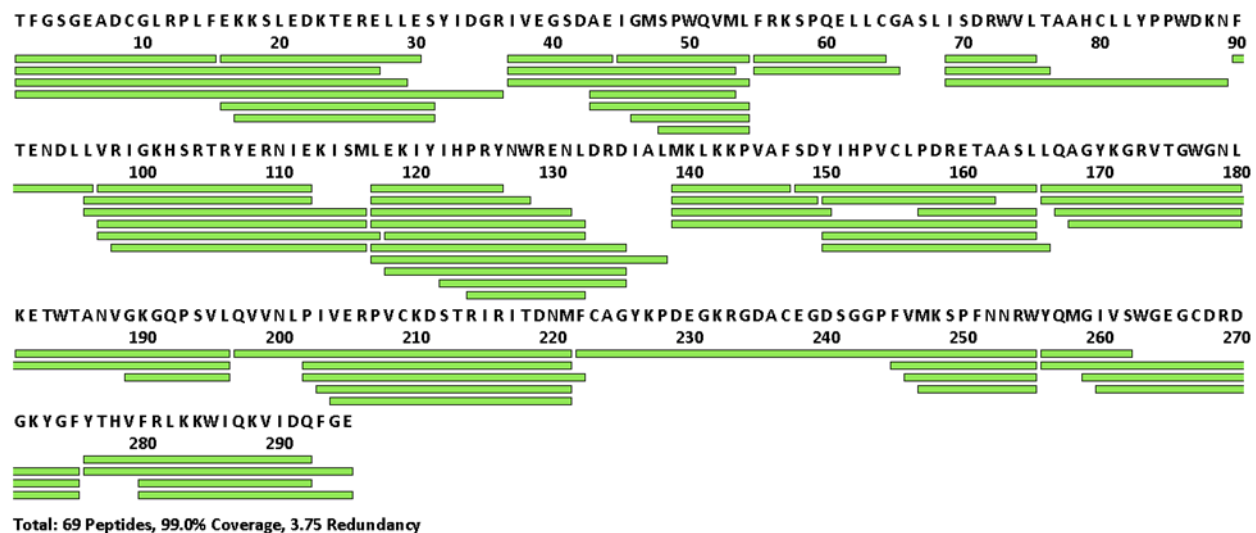

**Fig. S3.** Coverage map showing the peptides identified and evaluated during HDX-MS experiments on WT thrombin and thrombin-TM456.

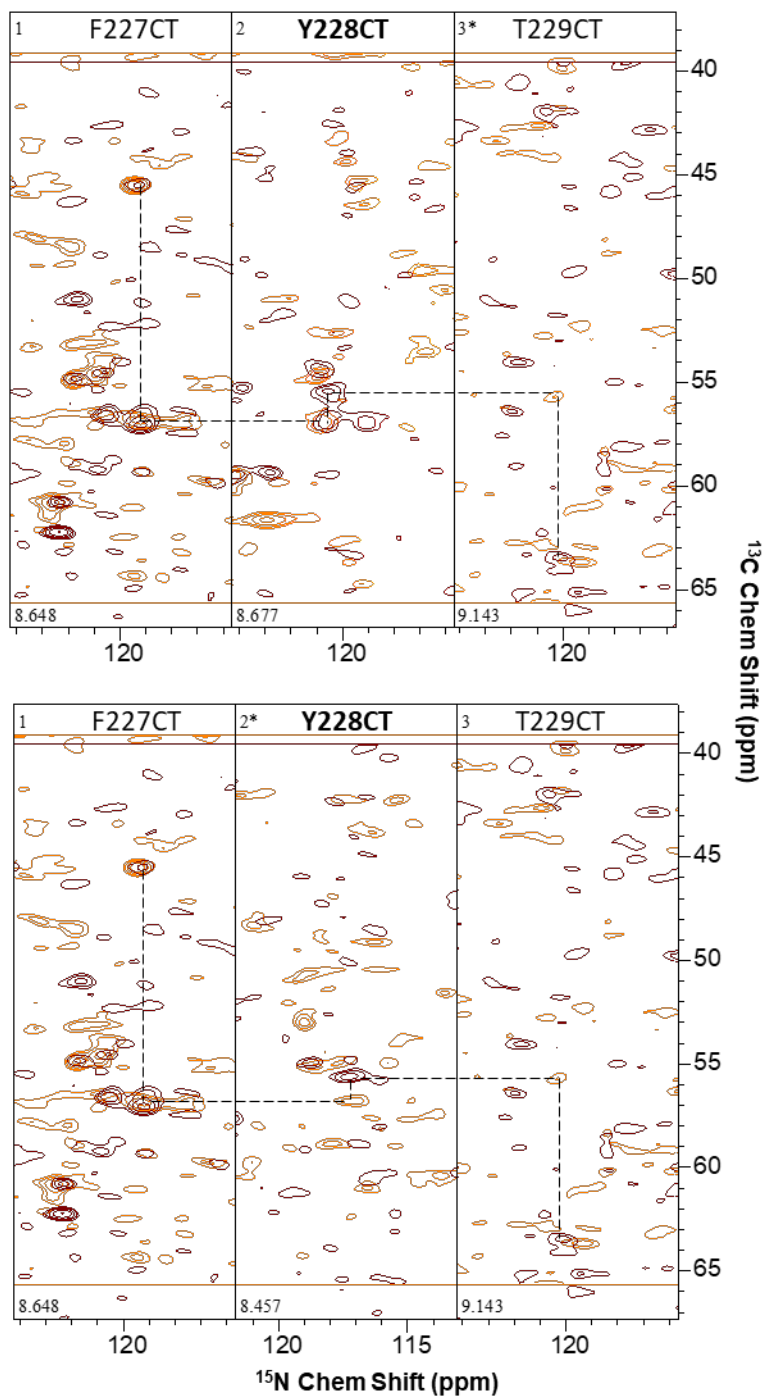

**Fig. S4.** Backbone walking from  $\text{Ca}_i$  to  $\text{Ca}_i$  HNCA peaks for both residue 228 assignments. The brown and orange spectra correspond to the HNCA and HNcoCA spectra taken at 800 MHz for thrombin-TM456.

**Table S1.** Experimental details for 3D spectra collected for backbone assignments and 2D relaxation dispersion spectra.

| Experiment                                  | # Scans | Spectral Window (ppm)<br>$^1\text{H}\times(^{13}\text{C}\times)^{15}\text{N}$ | Complex Points<br>$^1\text{H}\times(^{13}\text{C}\times)^{15}\text{N}$ | Offset (ppm)<br>$^1\text{H}\times(^{13}\text{C}\times)^{15}\text{N}$ | NUS sampling rate (%) |
|---------------------------------------------|---------|-------------------------------------------------------------------------------|------------------------------------------------------------------------|----------------------------------------------------------------------|-----------------------|
| 3D HNCA-TROSY*                              | 64      | 17.3×31.6×36.6                                                                | 1024×58×35                                                             | 4.77, 54.7, 118.1                                                    | 38                    |
| 3D HN(CO)CA-TROSY                           | 80      | 20×26.5×36.2                                                                  | 1024×56×48                                                             | 4.77, 52.4, 118.6                                                    | 36                    |
| 3D HNCO-TROSY                               | 64      | 20×14.6×36.2                                                                  | 1024×44×44                                                             | 4.77, 175.5, 118.6                                                   | 38                    |
| 2D $^{15}\text{N}$ -HSQC-TROSY*             | 16      | 17.3×36.6                                                                     | 1024×128                                                               | 4.77, 118.1                                                          | N/A                   |
| 2D $^{15}\text{N}$ -CPMG-TROSY              | 96      | 16.7×34.6                                                                     | 1024×128                                                               | 4.77, 118.7                                                          | N/A                   |
| 2D $^{15}\text{N}$ -CPMG-TROSY <sup>‡</sup> | 80      | 16.3×34.6                                                                     | 1024×98                                                                | 4.77, 118.1                                                          | N/A                   |

<sup>a</sup>All spectra were collected with a cryogenic probe at 600, 800<sup>‡</sup> and 900\* MHz ( $^1\text{H}$ ) at a temperature of 298 K.
